# Supplementary material for: Safety and Efficacy of Elobixibat, an Ileal Bile Acid Transporter Inhibitor, in Elderly Patients With Chronic Idiopathic Constipation According to Administration Time: Interim Analysis of Post-marketing Surveillance
Source: PubMed Central journal article supplement — J Neurogastroenterol Motil. 2022 Jul 30;28(3):431–41. doi: 10.5056/jnm20263 (PMC9274463; doi:10.5056/jnm20263), 2022-07-30
Supplement: jnm-28-3-431-supple.pdf [file jnm-28-3-431-supple.pdf]

**Supplementary Table 1.** Comparative Analysis of the Cases Requiring Fecal Disimpaction at 2 and 4 Weeks After Treatment With Elobixibat

| Fecal<br>disimpaction | Week 2 (n = 741) |     |                 | Week 4 (n = 770) |     |                 |
|-----------------------|------------------|-----|-----------------|------------------|-----|-----------------|
|                       | Yes              | No  | <i>P</i> -value | Yes              | No  | <i>P</i> -value |
| Baseline              |                  |     |                 |                  |     |                 |
| Yes                   | 17               | 78  | < 0.001         | 14               | 83  | < 0.001         |
| No                    | 11               | 635 |                 | 11               | 662 |                 |

Fecal disimpaction was evaluated in 741 patients who had both baseline and Week 2 data, or in 770 patients who had both baseline and Week 4 data.  
*P* < 0.001 vs baseline, McNemar's test.

**Supplementary Table 2.** Subpopulation Analysis of Bowel Movements and Bristol Stool Form Scale Score After Treatment in Patients Administered With Elobixibat Monotherapy (No Prior or Concomitant Administration of Drugs for Constipation)

| Item                           | Baseline        | Week 2                       | Week 4                       |
|--------------------------------|-----------------|------------------------------|------------------------------|
| Bowel movements                | 2.7 ± 1.6 (234) | 5.0 ± 3.1 <sup>a</sup> (204) | 5.3 ± 2.1 <sup>a</sup> (230) |
| Bristol stool form scale score | 2.0 ± 1.0 (274) | 3.8 ± 1.1 <sup>a</sup> (232) | 4.0 ± 0.9 <sup>a</sup> (255) |

<sup>a</sup> $P < 0.001$  vs baseline. Paired  $t$  test for bowel movements and Wilcoxon signed-rank test for Bristol Stool Form Scale score.

n, number of patients with each item at each visit.

Data are presented as mean ± SD (n).

**Supplementary Table 3.** Subpopulation Analysis of Bowel Movements and Bristol Stool Form Scale Score After Treatment With Elobixibat in Patients With Severe Constipation

| Item                           | Baseline        | Week 2                       | Week 4                       |
|--------------------------------|-----------------|------------------------------|------------------------------|
| Bowel movements                | 1.6 ± 0.5 (123) | 4.9 ± 2.7 <sup>a</sup> (102) | 5.1 ± 2.0 <sup>a</sup> (107) |
| Bristol stool form scale score | 1.6 ± 0.7 (120) | 3.7 ± 1.2 <sup>a</sup> (104) | 3.9 ± 1.0 <sup>a</sup> (108) |

<sup>a</sup> $P < 0.001$  vs baseline. Paired  $t$  test for bowel movements and Wilcoxon signed-rank test for Bristol Stool Form Scale score.

n, number of patients with each item at each visit.

Data are presented as mean ± SD (n).

**Supplementary Table 4.** Subpopulation Analysis of Bowel Movements and Bristol Stool Form Scale Score After Treatment With Elobixibat in Patients With Very Severe Constipation

| Item                           | Baseline           | Week 2                          | Week 4                          |
|--------------------------------|--------------------|---------------------------------|---------------------------------|
| Bowel movements                |                    |                                 |                                 |
| Mean $\pm$ SD (n)              | 0.9 $\pm$ 0.3 (44) | 4.2 $\pm$ 2.3 <sup>a</sup> (39) | 4.4 $\pm$ 2.1 <sup>a</sup> (40) |
| Bristol stool form scale score |                    |                                 |                                 |
| Mean $\pm$ SD (n)              | 1.4 $\pm$ 0.7 (41) | 3.6 $\pm$ 1.1 <sup>a</sup> (39) | 4.0 $\pm$ 1.1 <sup>a</sup> (40) |

<sup>a</sup> $P < 0.001$  vs baseline. Paired  $t$  test for bowel movements and Wilcoxon signed-rank test for Bristol Stool Form Scale score.  
n, number of patients with each item at each visit.
